# Supplementary material for: Interpretation of Strengthening Mechanism of Densified Wood from Supramolecular Structures
Source: MDPI journal article supplement (doi:10.3390/molecules27134167), 2022-06-29
Supplement: s1 [file s1]

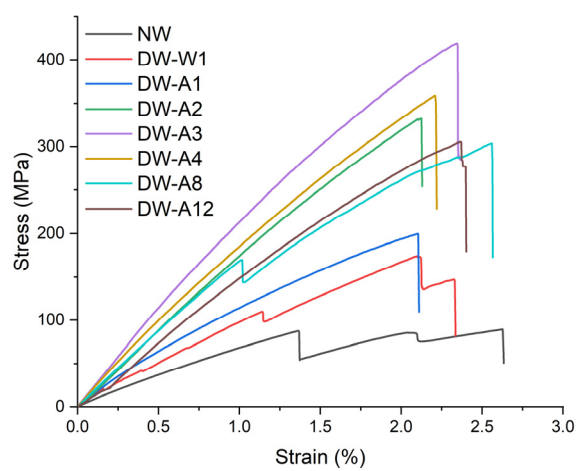

**Figure S1.** Stress-strain curve of NW and densified wood with various cooking time.

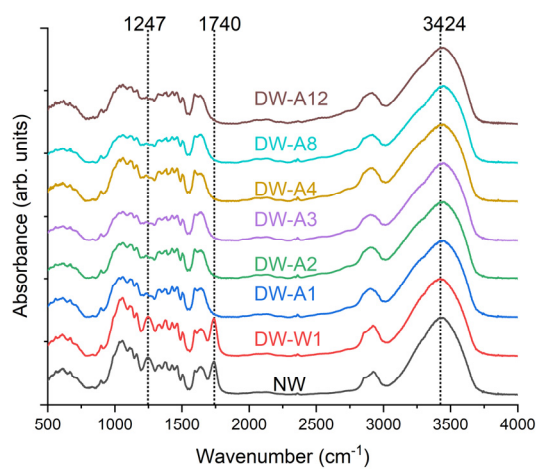

**Figure S2.** FT-IR of NW and densified wood.
